# Supplementary material for: Sensitive and selective SERS probe for trivalent chromium detection using citrate attached gold nanoparticles
Source: Royal Society of Chemistry journal article supplement (doi:10.1039/c2nr31985c), 2012-01-01
Supplement: c2nr31985c.pdf [file c2nr31985c.pdf]

## Supporting Information

Yingjie Ye,<sup>a,b</sup> Honglin Liu,<sup>a</sup> Liangbao Yang,<sup>\*a</sup> and Jinhuai Liu<sup>\*a</sup>

<sup>a</sup> Institute of Intelligent Machines, Chinese Academy of Sciences, Hefei 230031, China. Fax:

(+86)551-5592420; E-mail: lbyang@iim.ac.cn, jhliu@iim.ac.cn

<sup>b</sup> Department of Materials and Chemical Engineering, Henan Institute of Engineering, Zhengzhou,

Henan 451191, China

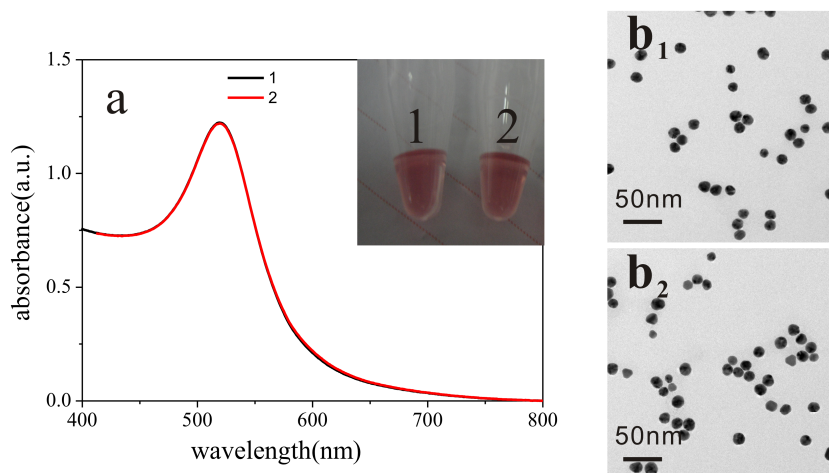

**Figure S1.** (a) UV-vis spectra of (1) Au NPs suspension and (2) Tween 20/Citrate-Au NPs. The inset shows the corresponding images of color. (b) The TEM images of (b<sub>1</sub>) Au NPs suspension and (b<sub>2</sub>) Tween 20/Citrate-Au NPs.

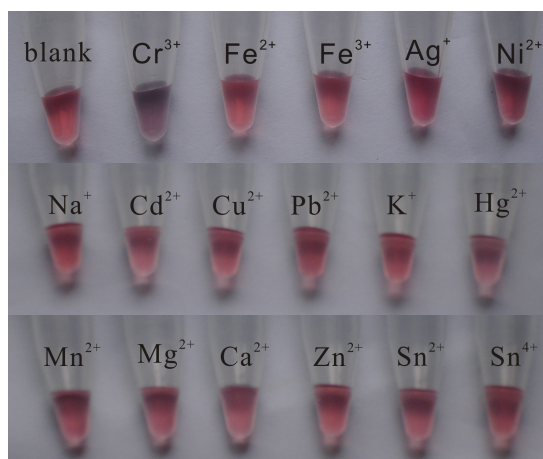

**Figure S2.** A photograph of the selectivity of using Tween 20/Citrate-Au NPs to detect Cr<sup>3+</sup> (3 μM).

Other metal ions were all used at 100 μM.

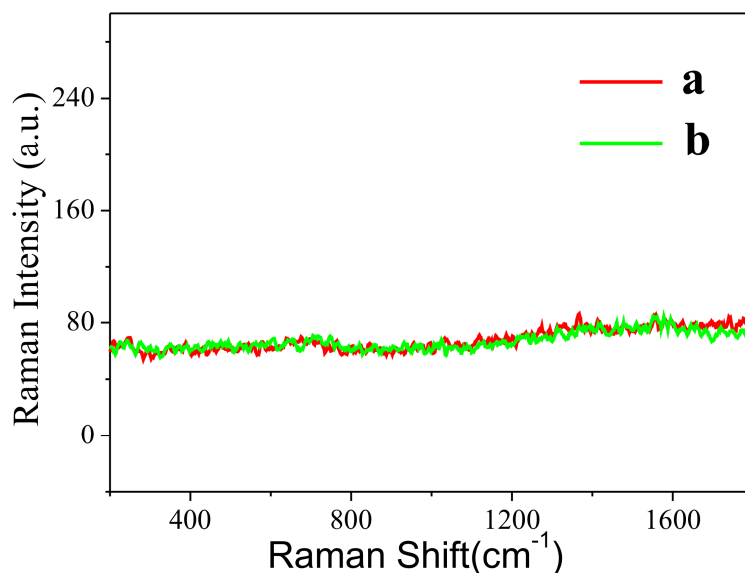

**Figure S3.** SERS spectra obtained from Tween 20/Citrate-Au NPs (a) in the absence of  $\text{Cr}^{3+}$  and (b) in the presence of  $10 \mu\text{M Cr}^{3+}$ .

To demonstrate that other molecules can also be used as the SERS probes, we have replaced 2-ATP with 4-aminothiophenol (4-ATP). And the methods of the preparation of the SERS substrates were the same as that of 2-ATP which acted as SERS probe. The SERS spectra of 4-ATP molecules are shown in figure S4a. The strongest peak at  $1083 \text{ cm}^{-1}$  is the  $\nu(\text{C-S})$  band of the characteristic SERS spectra of 4-ATP.<sup>1</sup> And we chose it as a reference peak for the spectra normalization. Figure S4b plots the SERS intensity at  $1083 \text{ cm}^{-1}$  versus the concentration of  $\text{Cr}^{3+}$ . As can be seen in the plot, the SERS signal increases as the concentration of  $\text{Cr}^{3+}$  increases. This observation is consistent with the previous behaviour of 2-ATP probe molecule.

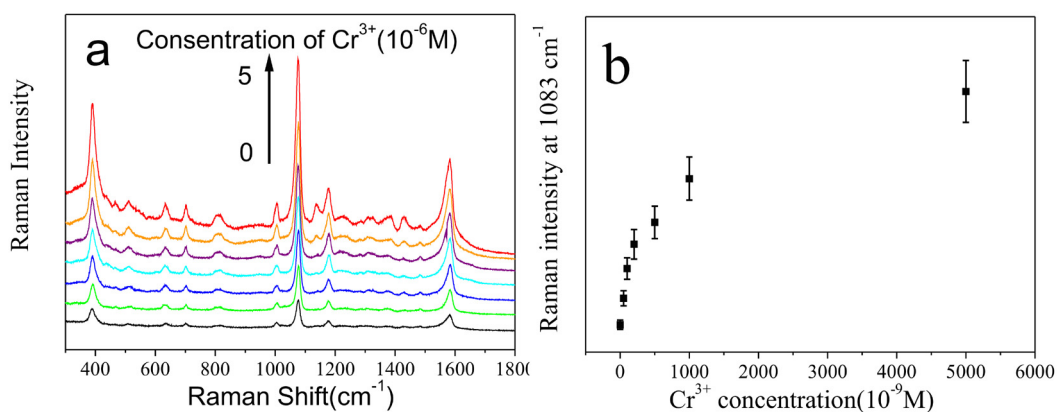

**Figure S4.** (a) The SERS spectra of 4-ATP obtained from our  $\text{Cr}^{3+}$ -sensing system in the presence

of different concentrations of  $\text{Cr}^{3+}$  ( $0-5 \times 10^{-6}$  M: 0 M,  $50 \times 10^{-9}$  M,  $100 \times 10^{-9}$  M,  $200 \times 10^{-9}$  M,  $500 \times 10^{-9}$  M,  $1 \times 10^{-6}$  M,  $5 \times 10^{-6}$  M). (b) Plot demonstrates how Raman intensity at  $1083 \text{ cm}^{-1}$  changes with the addition of different concentration of  $\text{Cr}^{3+}$ .

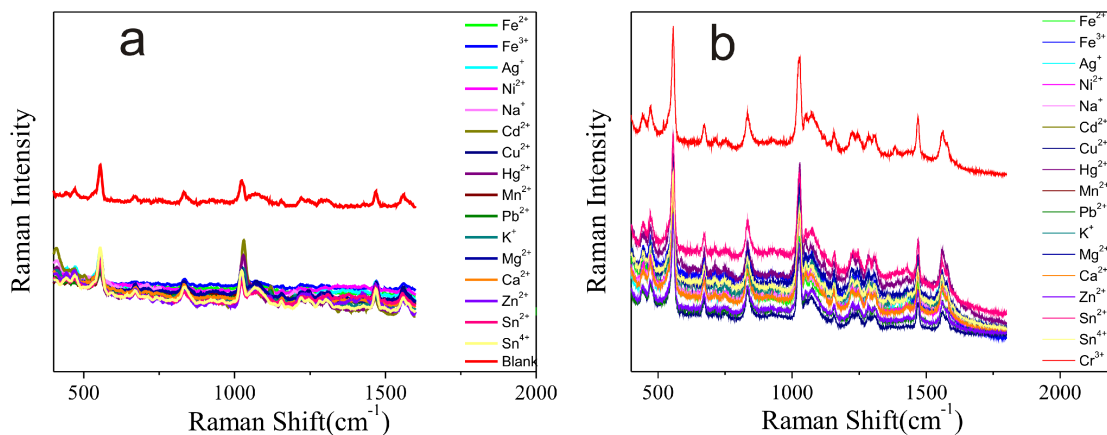

**Figure S5.** Demonstrating selectivity of our  $\text{Cr}^{3+}$ -sensing system over other metal ions. (a) The Raman intensity of the sensing systems in the absence of  $\text{Cr}^{3+}$  or in the presence of other metal ions ( $20 \times 10^{-6}$  M). (b) The Raman intensity of the sensing systems with the addition of  $\text{Cr}^{3+}$  ( $50 \times 10^{-9}$  M) and other metal ions ( $20 \times 10^{-6}$  M).

1. G. Merga, N. Saucedo, L. C. Cass, J. Puthussery and D. Meisel, *J Phys Chem C*, 2010, **114**, 14811-14818.
